# Supplementary material for: What’s wrong with Gen Z? – Post-pandemic persistence of depression and anxiety symptoms among young adults in Germany
Source: Research Square preprint supplement (doi:10.21203/rs.3.rs-8056528/v1), 2025-12-01
Supplement: Supplementary file 1 [file 957ddb0e0bcf3c1a90e1bcbc.pdf]

**Table 1a***Sensitivity analysis of the survey period for depression symptoms*

|               | 2 months |          | 3 months |          | 4 months |          |
|---------------|----------|----------|----------|----------|----------|----------|
|               | $\chi^2$ | <i>p</i> | $\chi^2$ | <i>p</i> | $\chi^2$ | <i>p</i> |
| Generation    | 713.99   | < .001   | 808.06   | < .001   | 864.46   | < .001   |
| Survey period | 127.99   | < .001   | 103.75   | < .001   | 102.67   | < .001   |
| Gender        | 70.12    | < .001   | 71.13    | < .001   | 70.76    | < .001   |
| Employment    | 176.87   | < .001   | 176.83   | < .001   | 176.52   | < .001   |
| Generation *  | 114.85   | < .001   | 89.93    | < .001   | 86.82    | < .001   |
| Survey period |          |          |          |          |          |          |

**Table 1b***Sensitivity analysis of the survey period for anxiety symptoms*

|               | 2 months |          | 3 months |          | 4 months |          |
|---------------|----------|----------|----------|----------|----------|----------|
|               | $\chi^2$ | <i>p</i> | $\chi^2$ | <i>p</i> | $\chi^2$ | <i>p</i> |
| Generation    | 636.34   | < .001   | 745.30   | < .001   | 808.76   | < .001   |
| Survey period | 59.11    | < .001   | 40.66    | < .001   | 40.03    | < .001   |
| Gender        | 327.65   | < .001   | 327.69   | < .001   | 329.88   | < .001   |
| Employment    | 131.37   | < .001   | 130.46   | < .001   | 131.36   | < .001   |
| Generation *  | 125.57   | < .001   | 86.57    | < .001   | 94.87    | < .001   |
| Survey period |          |          |          |          |          |          |
